# Supplementary material for: KRAS-driven model of Gorham-Stout disease effectively treated with trametinib
Source: JCI journal article supplement (doi:10.1172/jci.insight.149831), 2021-06-22

**Supplemental Figure 1. A.** Image of chyle from an *iLEC<sup>Kras</sup>* mouse. **B.** Survival curves for *iLEC<sup>Ctrl</sup>* mice (n = 23) and *iLEC<sup>Kras</sup>* mice (n = 13). Mice were fed tamoxifen (2  $\mu$ l of 25 mg/ml solution) from P0-P2. The median survival of *iLEC<sup>Kras</sup>* mice was 26 days.  $P < 0.0001$ ; log-rank (Mantel-Cox) test.

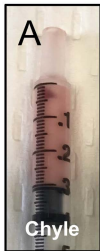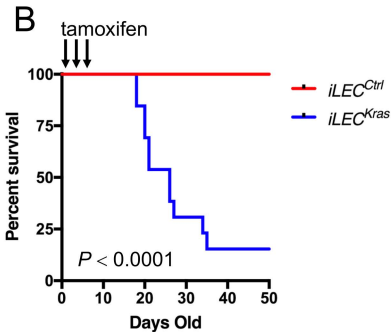

Supplement: sd1 [file 1]
